# Supplementary material for: Biomarkers of Oxidative Stress in Healthy Infants within the First Three Days after Birth
Source: MDPI journal article supplement (doi:10.3390/antiox12061249), 2023-06-09
Supplement: s1 [file s1]

## SUPPLEMENTARY MATERIAL

Table S1. Levels of total antioxidant capacity, creatinine, and malondialdehyde in urine

|                       |        | 0-12 h      | 12-24 h     | 24-36 h      | 36-48 h     | 48-60 h     | 60-72 h      | >72 h     |
|-----------------------|--------|-------------|-------------|--------------|-------------|-------------|--------------|-----------|
| FRAP<br>(mM Fe(II)E)  | N      | 53          | 96          | 40           | 101         | 60          | 29           | 14        |
|                       | Mean   | 25.08       | 30.16       | 37.35        | 35.89       | 30.56       | 30.99        | 21.76     |
|                       | SD     | 14.62       | 17.15       | 21.30        | 18.97       | 18.67       | 25.47        | 19.57     |
|                       | Median | 20.8        | 24.75       | 38.17        | 35.28       | 29.38       | 25.72        | 13.57     |
|                       | IQR    | 14.48-32.69 | 15.77-41.22 | 16.64-52.23  | 21.27-46.55 | 13.42-45.15 | 12.01-39.82  | 5.96-37.4 |
| Creatinine<br>(mg/dl) | N      | 40          | 87          | 34           | 91          | 50          | 26           | 12        |
|                       | Mean   | 70.49       | 79.82       | 95.24        | 113.05      | 98.66       | 84.85        | 55.04     |
|                       | SD     | 52.09       | 43.57       | 38.06        | 55.72       | 61.23       | 56.91        | 53.38     |
|                       | Median | 56.90       | 72.40       | 98.00        | 111.3       | 95.45       | 68.50        | 47.80     |
|                       | IQR    | 32.9-90.03  | 49.5-112.2  | 61.95-126.53 | 67.8-148.4  | 42.28-139.5 | 39.35-134.45 | 14.0-62.9 |
| MDA<br>(μM)           | N      | 45          | 91          | 39           | 94          | 55          | 27           | 14        |
|                       | Mean   | 1.88        | 1.82        | 1.84         | 1.84        | 2.04        | 2.06         | 1.5       |
|                       | SD     | 1.52        | 1.17        | 1.09         | 1.16        | 1.16        | 1.28         | 0.93      |
|                       | Median | 1.12        | 1.57        | 2            | 1.43        | 2.04        | 1.51         | 1.42      |
|                       | IQR    | 0.78-2.9    | 0.94-2.7    | 0.84-2.74    | 0.97-2.66   | 1.08-2.79   | 0.96-2.78    | 0.6-2.3   |

FRAP, Ferric reducing ability of plasma; GSH, MDA, malondialdehyde; SD, standard deviation

Table S2. Correlation between oxidative stress parameters in plasma and urine samples from the study population.

|     |       |         | Urine (<10 h after delivery) |        | Urine (44 to 52 h after delivery) |        |
|-----|-------|---------|------------------------------|--------|-----------------------------------|--------|
| TAC | Blood |         | TAC                          | MDA    | TAC                               | MDA    |
|     | UV    | r       | -0.234                       | -0.001 | 0.052                             | 0.162  |
|     |       | p-value | 0.306                        | 0.997  | 0.644                             | 0.169  |
|     |       | N       | 21                           | 16     | 82                                | 74     |
|     | UA    | r       | -0.547                       | -0.403 | 0.107                             | -0.007 |
|     |       | p-value | 0.013 <sup>a</sup>           | 0.136  | 0.334                             | 0.954  |
|     |       | N       | 20                           | 15     | 83                                | 75     |
|     | 48h   | r       | -0.185                       | 0.058  | -0.037                            | 0.163  |
|     |       | p-value | 0.463                        | 0.850  | 0.730                             | 0.136  |
|     |       | N       | 18                           | 13     | 92                                | 85     |
| GSH | UV    | r       | 0.020                        | -0.058 | 0.072                             | 0.064  |
|     |       | p-value | 0.938                        | 0.844  | 0.593                             | 0.661  |
|     |       | N       | 18                           | 14     | 57                                | 50     |
|     | UA    | r       | 0.192                        | -0.077 | -0.012                            | 0.092  |
|     |       |         |                              |        |                                   |        |

|                 |     |         |        |                    |        |        |
|-----------------|-----|---------|--------|--------------------|--------|--------|
|                 |     | p-value | 0.446  | 0.794              | 0.934  | 0.544  |
|                 |     | N       | 18     | 14                 | 53     | 46     |
|                 | 48h | r       | -0.066 | -0.157             | 0.109  | -0.062 |
|                 |     | p-value | 0.831  | 0.645              | 0.392  | 0.634  |
|                 |     | N       | 13     | 11                 | 64     | 61     |
| GSH/GSSG        | UV  | r       | 0.180  | 0.700              | -0.006 | -0.029 |
|                 |     | p-value | 0.461  | 0.004 <sup>a</sup> | 0.959  | 0.829  |
|                 |     | N       | 19     | 15                 | 66     | 59     |
|                 | UA  | r       | 0.039  | 0.373              | -0.103 | 0.041  |
|                 |     | p-value | 0.877  | 0.188              | 0.427  | 0.769  |
|                 |     | N       | 18     | 14                 | 62     | 55     |
|                 | 48h | r       | -0.008 | 0.145              | -0.193 | -0.032 |
|                 |     | p-value | 0.975  | 0.592              | 0.093  | 0.790  |
|                 |     | N       | 20     | 16                 | 77     | 71     |
| MDA             | UV  | r       | -0.443 | 0.343              | -0.146 | -0.168 |
|                 |     | p-value | 0.066  | 0.211              | 0.276  | 0.238  |
|                 |     | N       | 18     | 15                 | 58     | 51     |
|                 | UA  | r       | -0.155 | 0.140              | -0.144 | 0.007  |
|                 |     | p-value | 0.567  | 0.648              | 0.289  | 0.964  |
|                 |     | N       | 16     | 13                 | 56     | 50     |
|                 | 48h | r       | -0.585 | -0.874             | 0.069  | -0.336 |
|                 |     | p-value | 0.222  | 0.126              | 0.703  | 0.064  |
|                 |     | N       | 6      | 4                  | 33     | 31     |
| Carbonyl groups | UV  | r       | -0.395 | -0.259             | 0.119  | 0.015  |
|                 |     | p-value | 0.105  | 0.351              | 0.332  | 0.909  |
|                 |     | N       | 18     | 15                 | 68     | 63     |
|                 | UA  | r       | -0.408 | -0.180             | -0.024 | 0.219  |
|                 |     | p-value | 0.104  | 0.539              | 0.842  | 0.080  |
|                 |     | N       | 17     | 14                 | 73     | 65     |
|                 | 48h | r       | -0.151 | -0.402             | -0.141 | 0.110  |
|                 |     | p-value | 0.657  | 0.324              | 0.243  | 0.388  |
|                 |     | N       | 11     | 8                  | 70     | 64     |

Legend (Table 4). FRAP, Ferric reducing ability of plasma; GSH, total glutathione; GSH/GSSG, relation of reduced/oxidized glutathione; MDA, malondialdehyde; N, number of observations; r, Pearson coefficient; UA, umbilical artery; UV, umbilical vein.

<sup>a</sup> p-value (two-tail) <0.05 is considered statistically significant.
